# Supplementary material for: Measuring rainfall using microwave links: the influence of temporal sampling
Source: Copernicus journal article supplement (doi:10.5194/egusphere-2023-1971), 2023-09-13
Supplement: Supplementary file 1 [file egusphere-2023-1971-supplement.pdf]

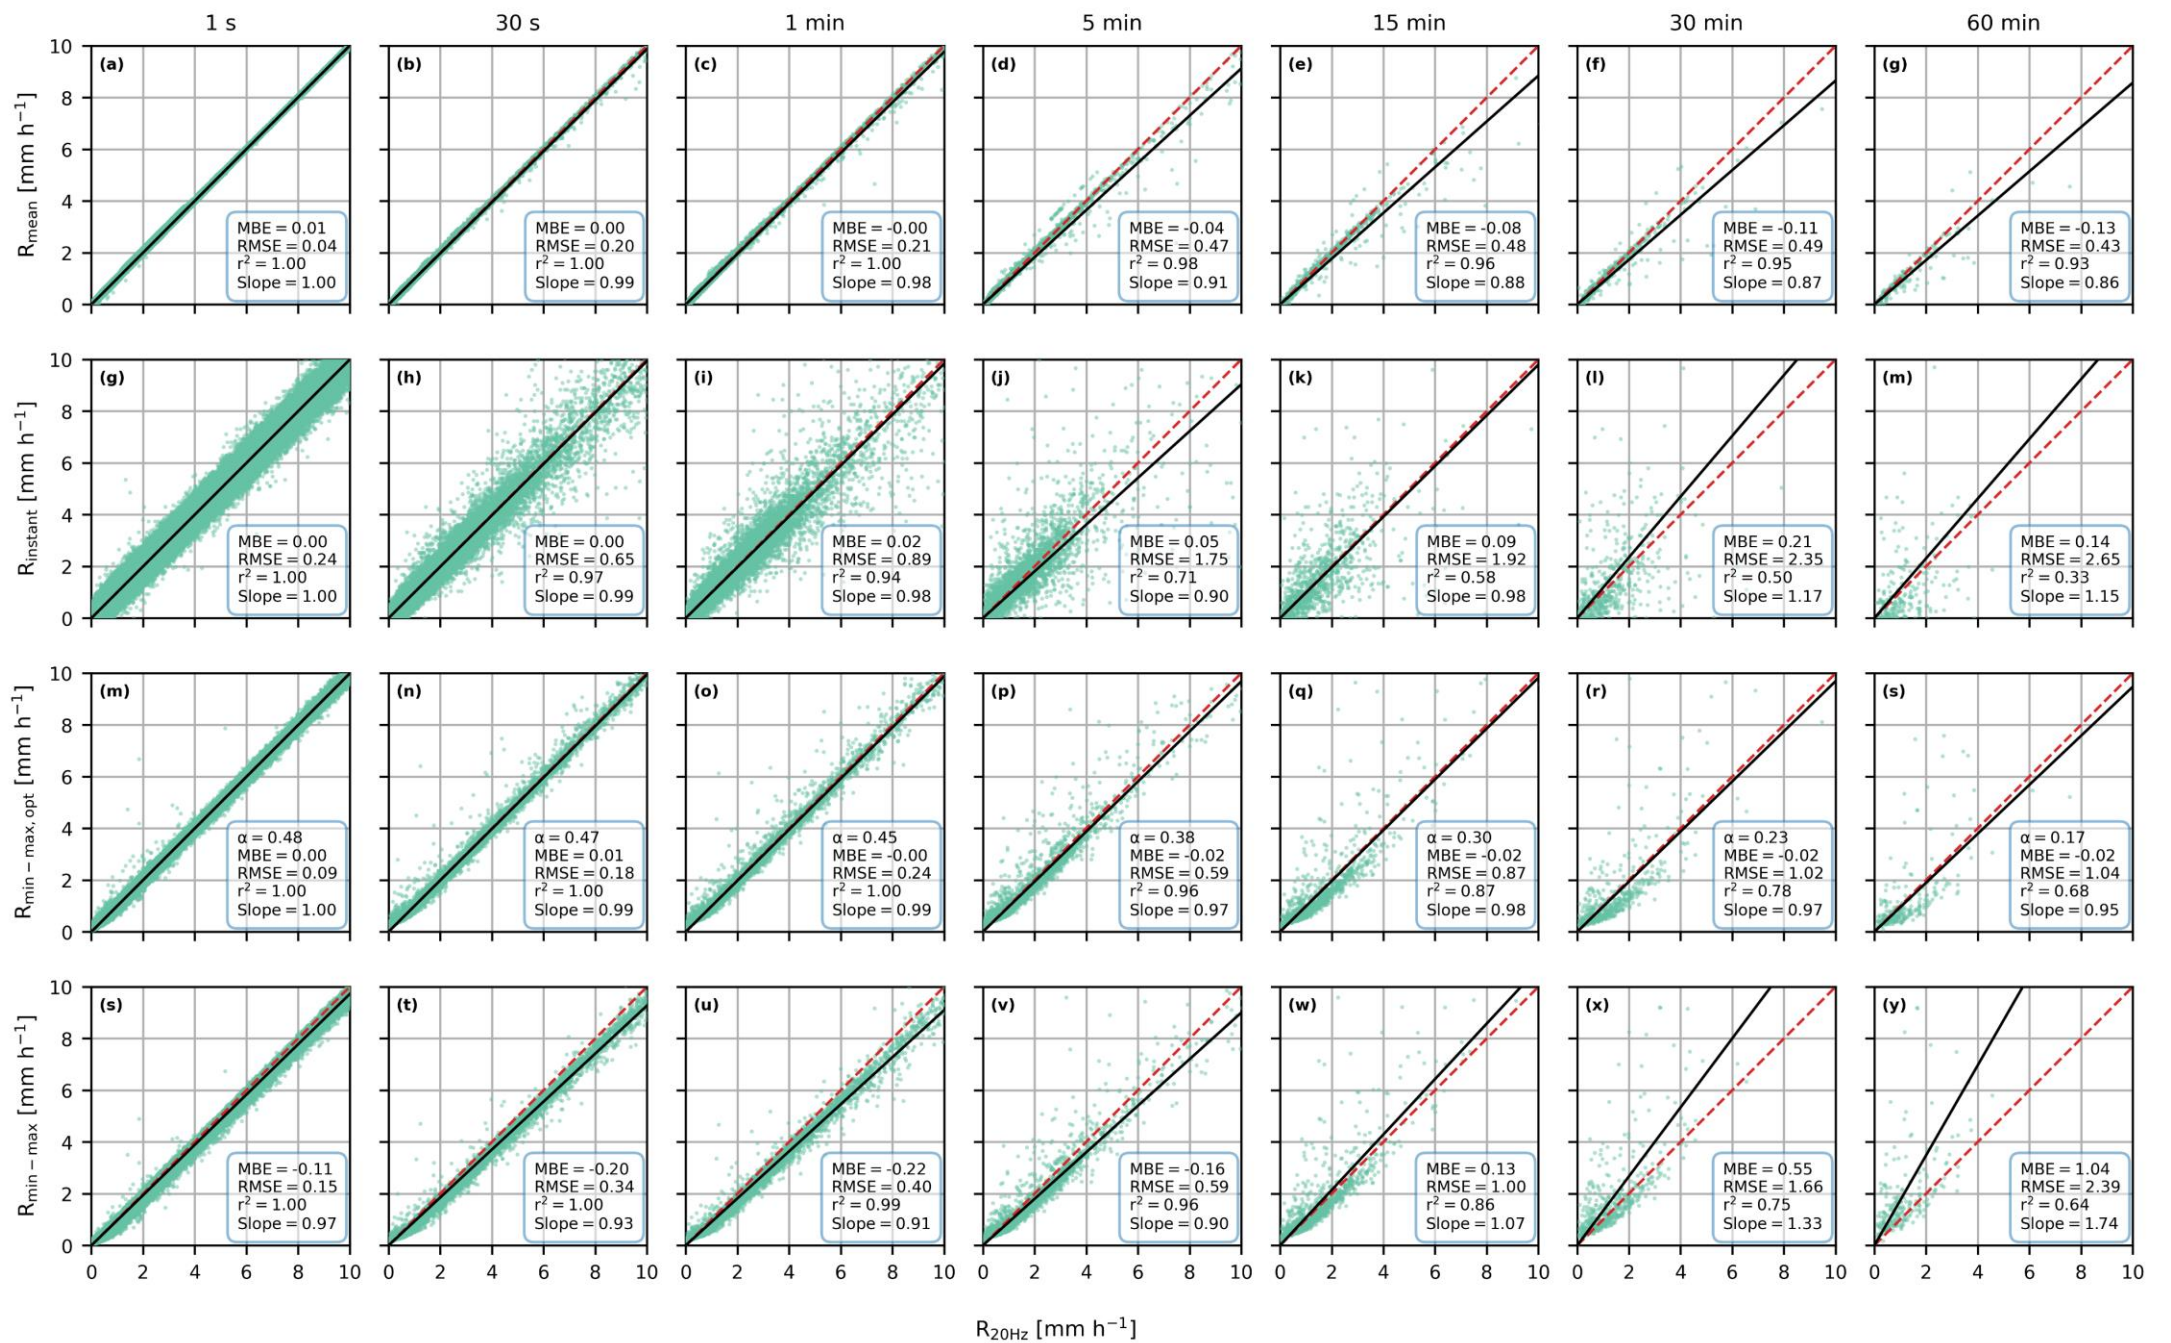

**Figure S1.** Comparison of rainfall intensities derived for the various time intervals (columns) and methods (rows) versus time-averaged rainfall intensities computed with the 20 Hz data for the Nokia Flexihopper microwave link. Optimization of  $\alpha$  is similar as in Overeem et al. (2011). The red dashed line is the 1:1 line and the black line represents the linear regression line.

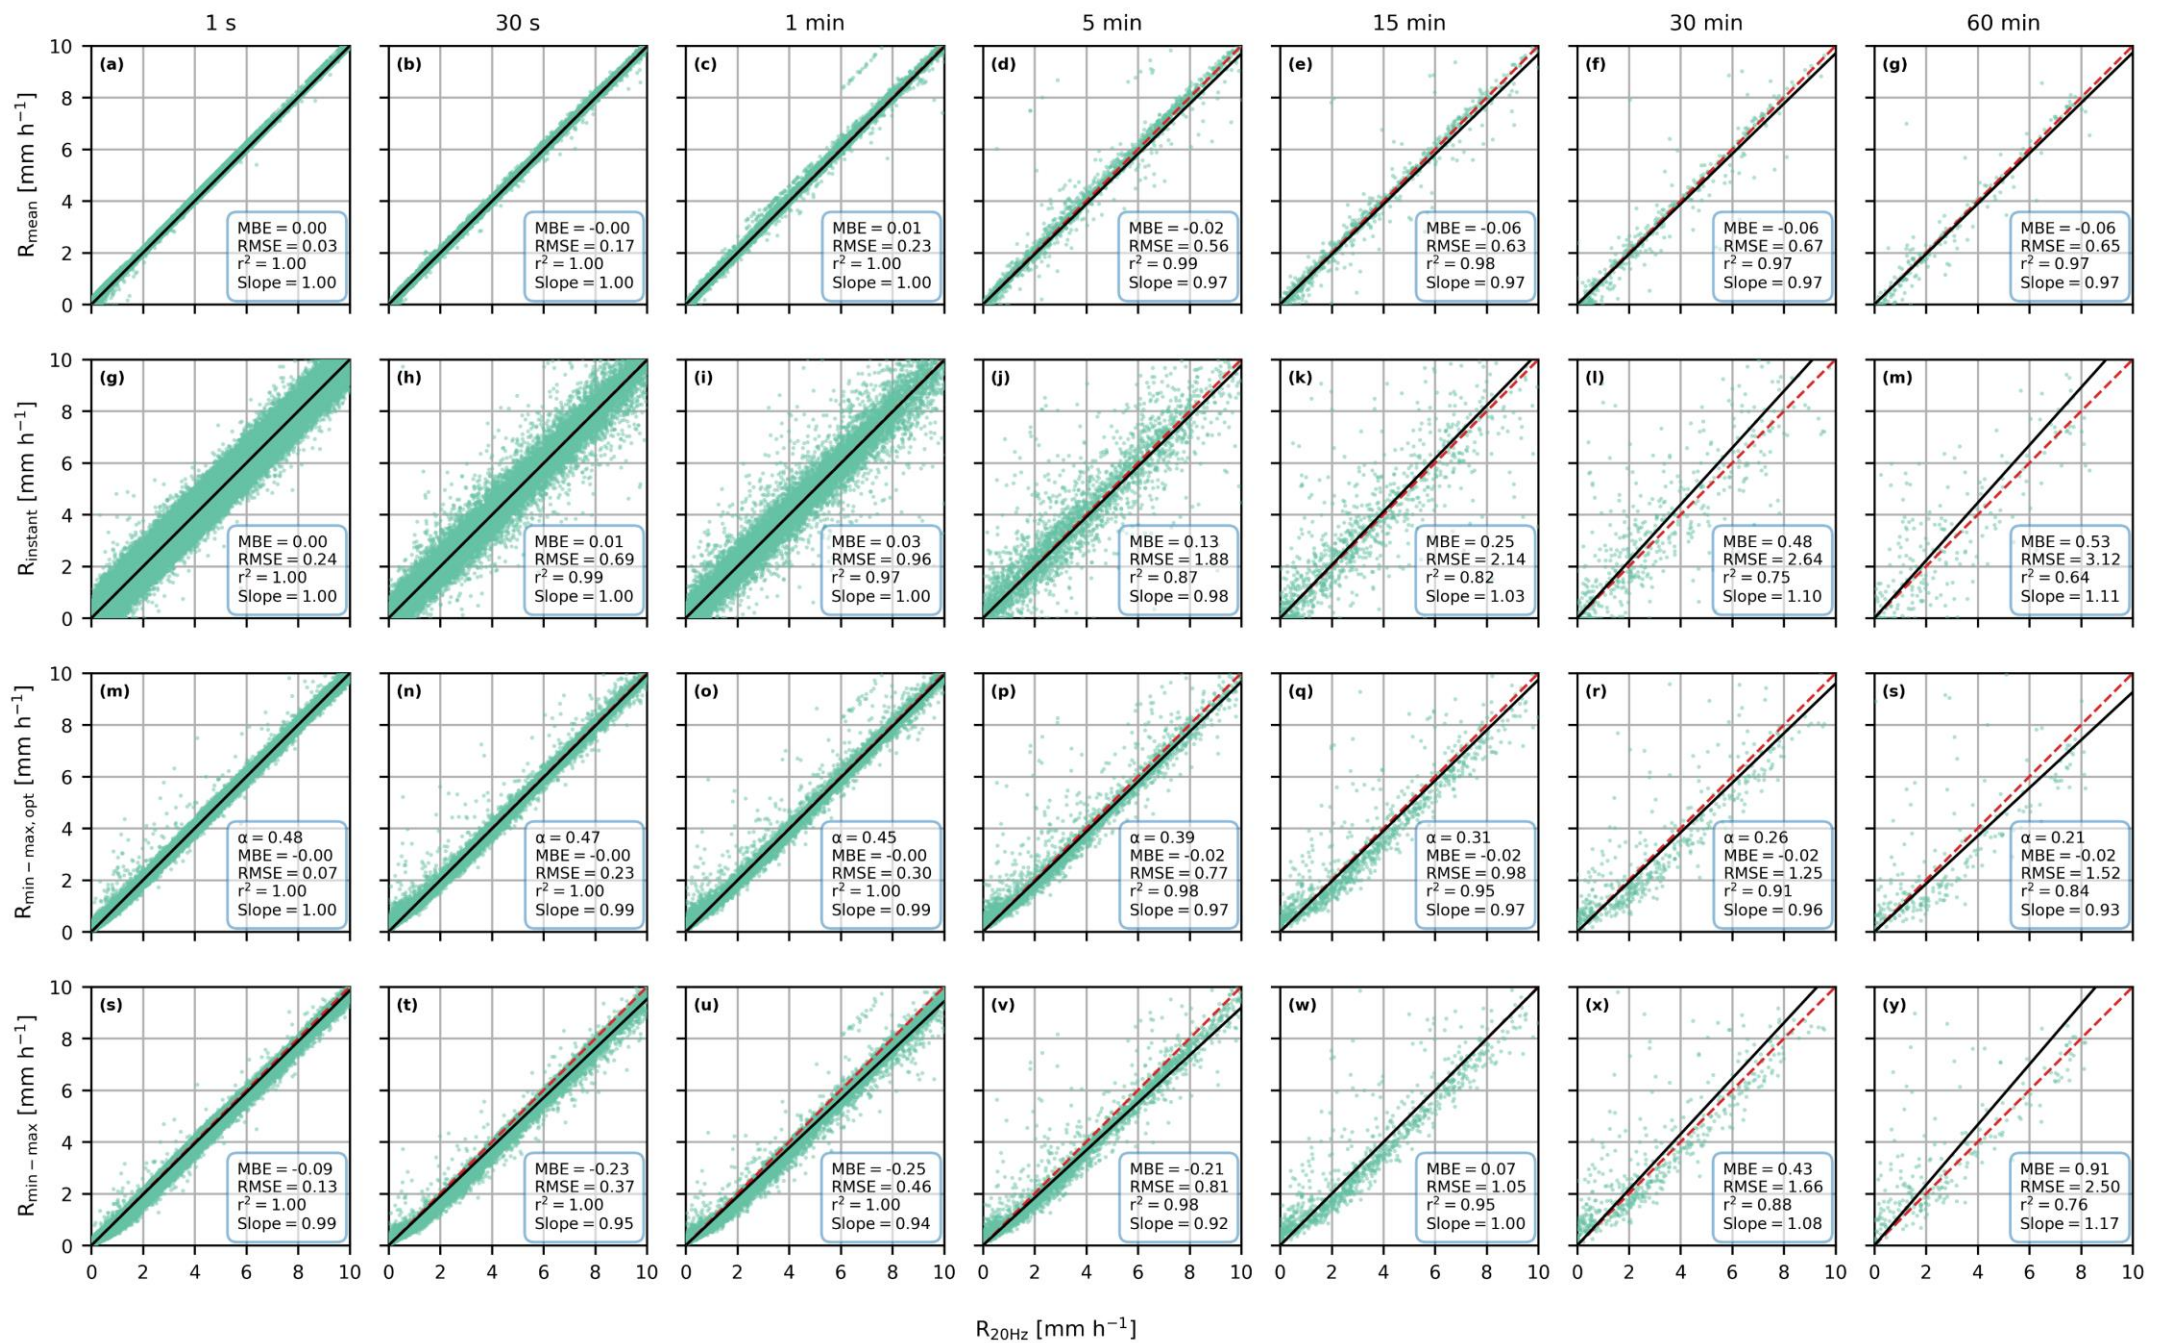

**Figure S2.** Comparison of rainfall intensities derived for the various time intervals (columns) and methods (rows) versus time-averaged rainfall intensities computed with the 20 Hz data for the RAL 38 GHz horizontally polarized microwave link. Optimization of  $\alpha$  is similar as in Overeem et al. (2011). The red dashed line is the 1:1 line and the black line represents the linear regression line.

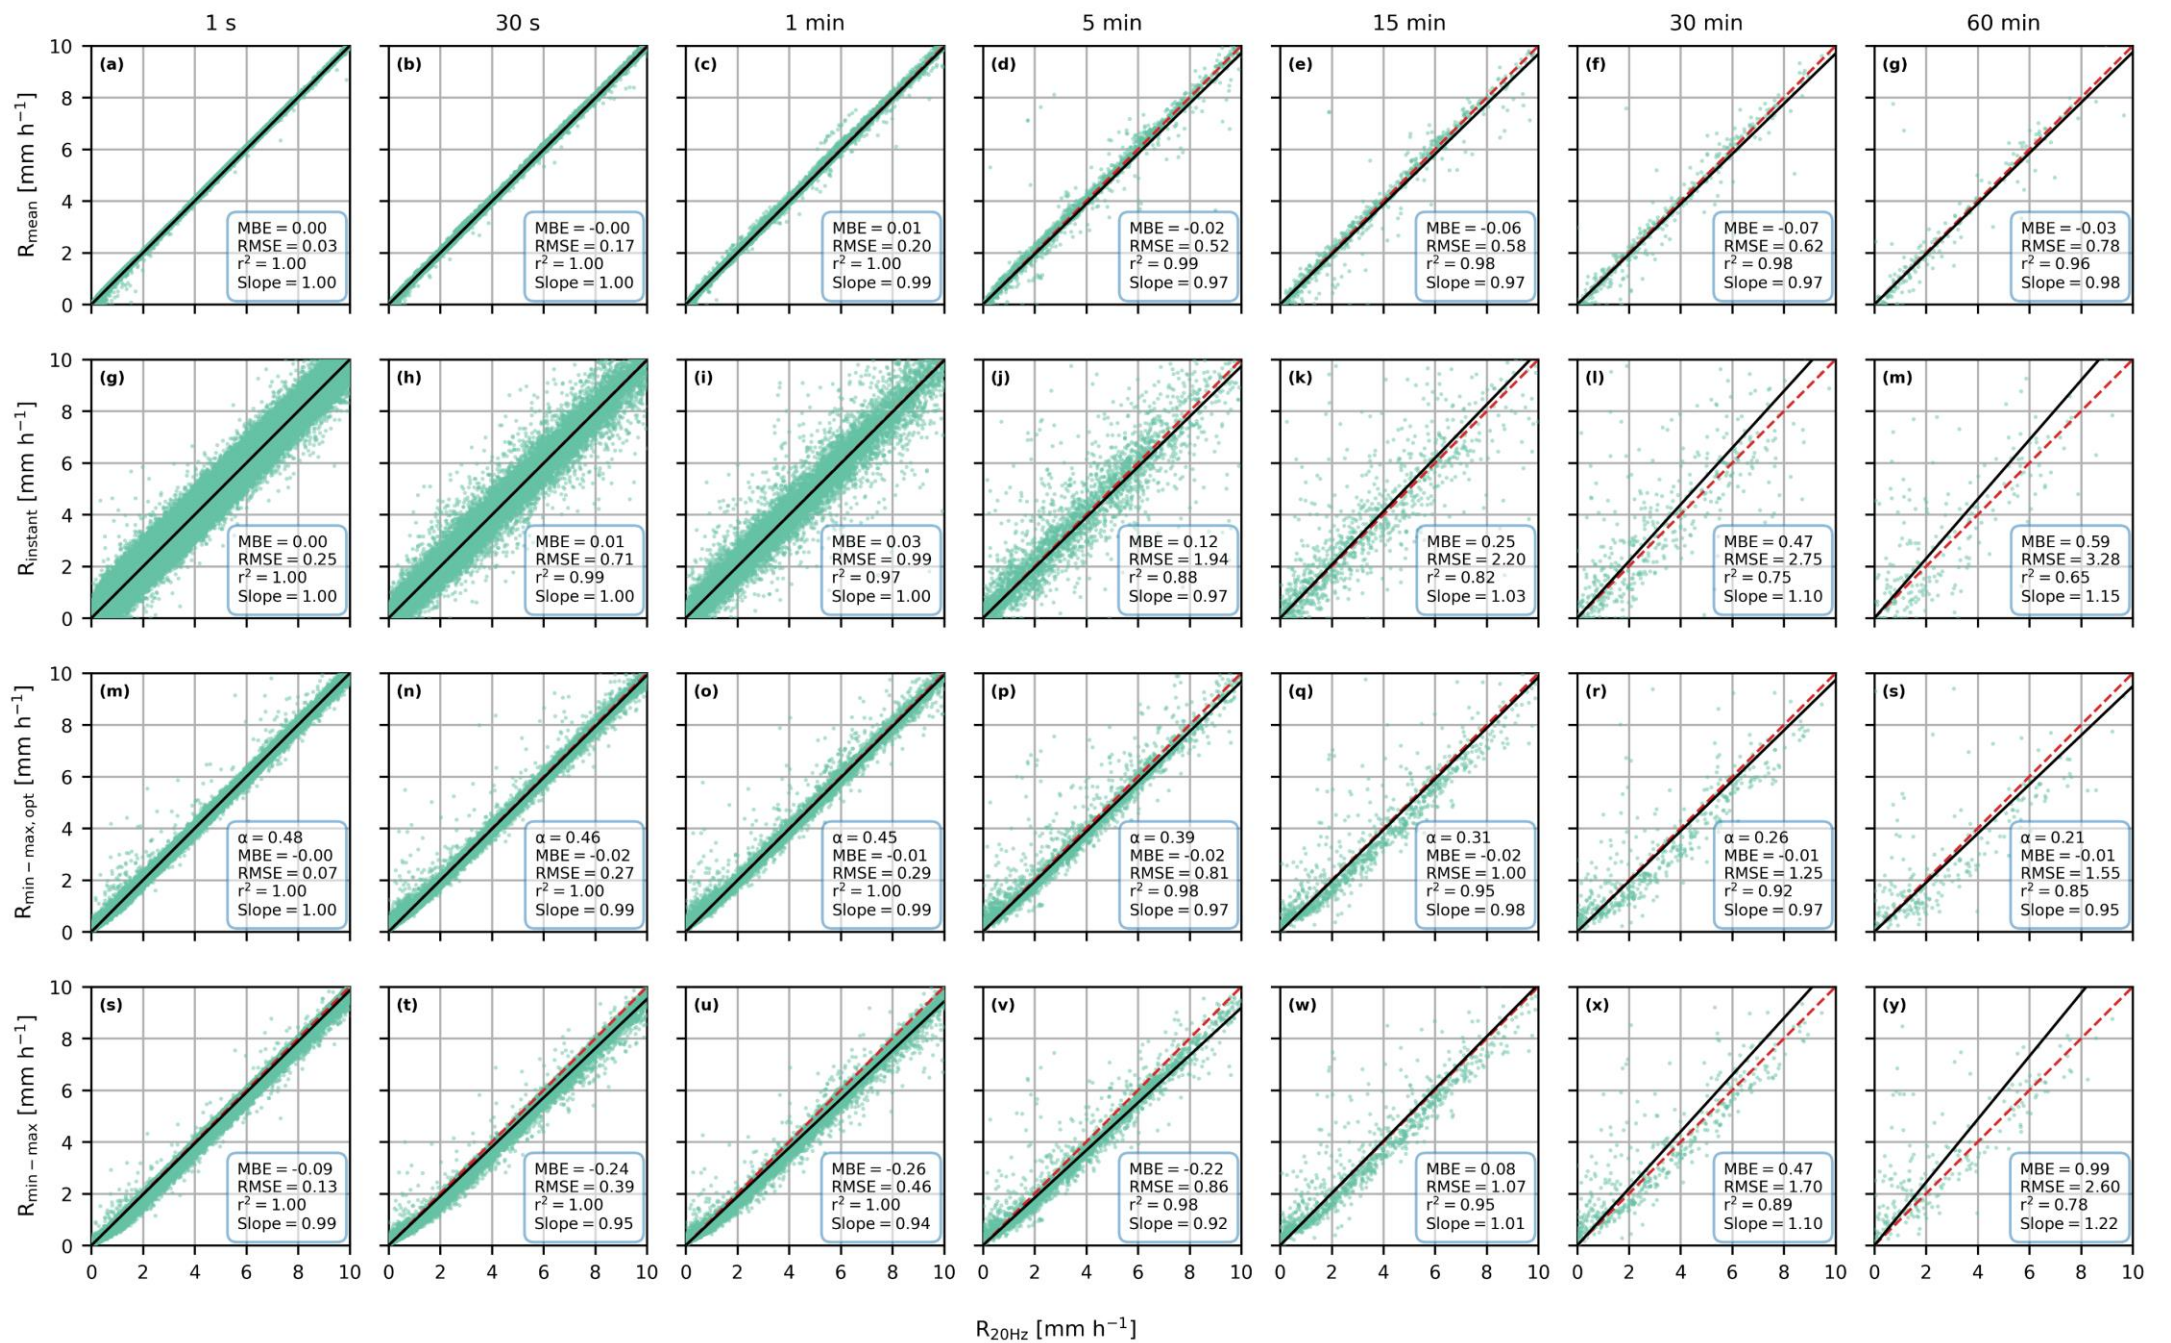

**Figure S3.** Comparison of rainfall intensities derived for the various time intervals (columns) and methods (rows) versus time-averaged rainfall intensities computed with the 20 Hz data for the RAL 38 GHz vertically polarized microwave link. Optimization of  $\alpha$  is similar as in Overeem et al. (2011). The red dashed line is the 1:1 line and the black line represents the linear regression line.

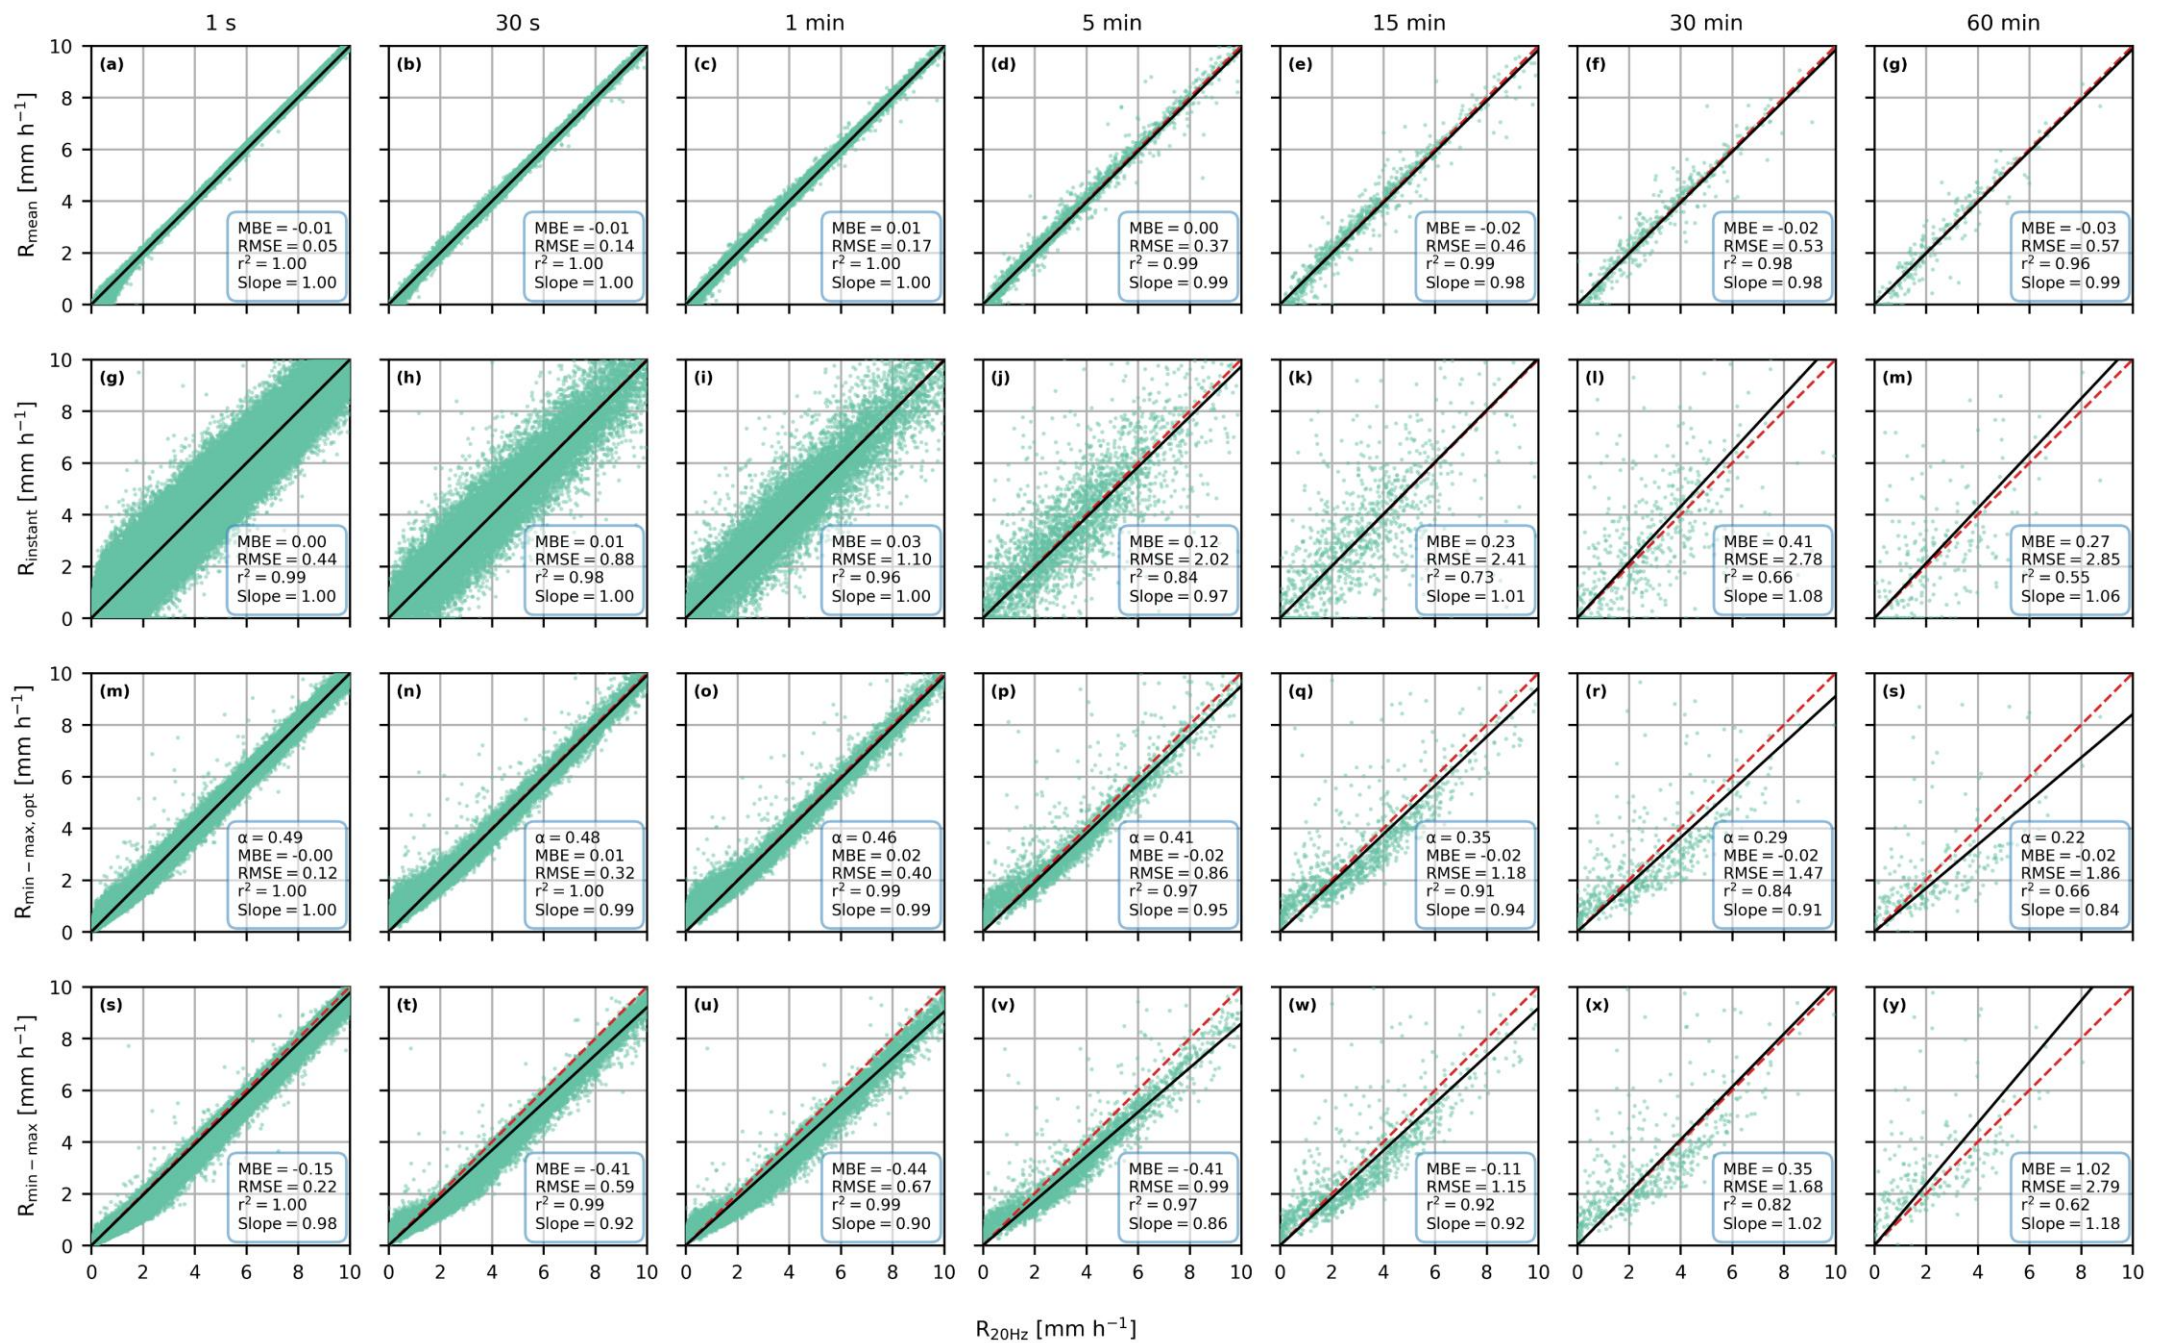

**Figure S4.** Comparison of rainfall intensities derived for the various time intervals (columns) and methods (rows) versus time-averaged rainfall intensities computed with the 20 Hz data for the RAL 26 GHz horizontally polarized microwave link. Optimization of  $\alpha$  is similar as in Overeem et al. (2011). The red dashed line is the 1:1 line and the black line represents the linear regression line.
