# Supplementary material for: Measuring rainfall using microwave links: the influence of temporal sampling
Source: Copernicus journal article supplement (doi:10.5194/egusphere-2023-1971), 2023-09-13
Supplement: Supplementary file [file egusphere-2023-1971-AC3-supplement.pdf]

Dear Referee,

We would like to thank you for taking the time to review our paper and for your suggestions, which helped to improve the quality of the manuscript. We reply to your comments below. Our response to the comments appears in bold and revised text as *italic*.

- P2, L52: "complimentary" -> complementary  
**We agree and changed as follows:**  
*van het Schip et al. (2017) showed the **complementary** potential of CML and satellite data by determining wet and dry periods using the satellite data, while Hoedjes et al. (2014) proposed to use this for a conceptual flash flood early warning system in Kenya.*
- P3, L69. Papua New Guinea is actually in Oceania. Do you actually mean Papua New Guinea or some other country (Guinea, Equatorial Guinea, Guinea Bissau) that is actually in Africa?  
**We made a mistake and indeed mean Papua New Guinea. We changed this as follows:**  
*Since then, studies have been performed in Europe (Czech Republic, France, Germany, Italy, Luxembourg, Sweden and Switzerland), Africa (Burkina Faso, Kenya and Nigeria), South America (Brazil), Asia (Lebanon, Pakistan and Sri Lanka) and **Oceania (Australia and Papua New Guinea)** (see Chwala and Kunstmann, 2019, for a partial overview)*
- P3, L77-78. Consider rephrasing as "minimum and maximum values (and occasionally mean and/or instantaneous values) are most commonly measured with a temporal resolution of 15 minutes"  
**We agree that this is suggestion is a better formulated sentence:**  
*Moreover, not all mobile network operators store the same variables describing the link signal in their network management system. **Minimum and maximum values (and occasionally mean and/or instantaneous values) are most commonly measured with a temporal resolution of 15 minutes. Additionally, ....***
- P8. L203-204. "This makes that... are different..". Consider rephrasing as "This causes the rain intensities... to be different..."  
**We agree and changed accordingly:**  
***This causes the rain intensities obtained by using averaged attenuation to be different compared to the averaged rainfall intensities.***
- P11, L327, "We expect that this caused..." -> "We expect that this is caused..."  
**We agree, the word "is" is missing in this sentence. We have added it to the new version:**  
*We expect that this **is** caused by the large sample size, which reduces these uncertainties.*
